# Supplementary material for: A novel organogelator incorporating tert-butyl esters of asparagines
Source: Royal Society of Chemistry journal article supplement (doi:10.1039/b817565a), 2008-11-20

*Supporting Information*

**A novel organogelator incorporating *tert*-butyl  
esters of asparagines**

Virginia Lozano,<sup>a</sup> Rebeca Hernández,<sup>b</sup> Carmen Mijangos<sup>b</sup> and  
María-Jesús Pérez-Pérez\*<sup>a</sup>

<sup>a</sup> *Instituto de Química Médica (CSIC), c/ Juan de la Cierva 3, E-28006 Madrid (Spain).*

<sup>b</sup> *Instituto de Ciencia y Tecnología de Polímeros (CSIC), c/ Juan de la Cierva 3, E-28006 Madrid  
(Spain).*

E-mail: [mjperez@iqm.csic.es](mailto:mjperez@iqm.csic.es)

**Contents list**

|                                                    |    |
|----------------------------------------------------|----|
| 1. FT-IR of compound <b>1</b> in solution          | S2 |
| 2. Atomic force microscopy                         | S3 |
| 3. Molecular model of compound <b>1</b>            | S4 |
| 4. <sup>1</sup> H NMR Spectra of compound <b>1</b> | S6 |

**Figure S1.** FT-IR spectra corresponding to the compound **1** in solution in 1,4-dioxane.

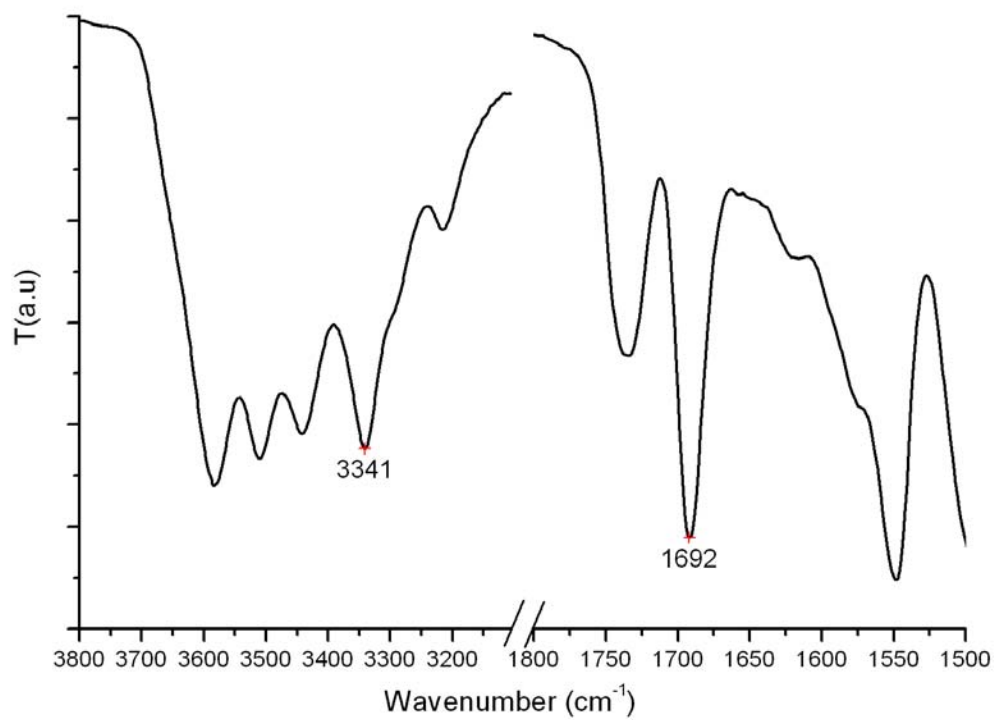

### Atomic force microscopy

Samples were imaged using a multimode AFM with Nanoscope IIIe control system (Veeco Instruments, Santa Barbara, CA) operating in tapping mode. Topographic data were recorded in air at room temperature with a standard silicon tapping tip on a beam cantilever. Dioxane solutions of compound **1** (4 wt%) were transferred onto a glass slide and then dried for 1 hour at room temperature, followed by AFM imaging.

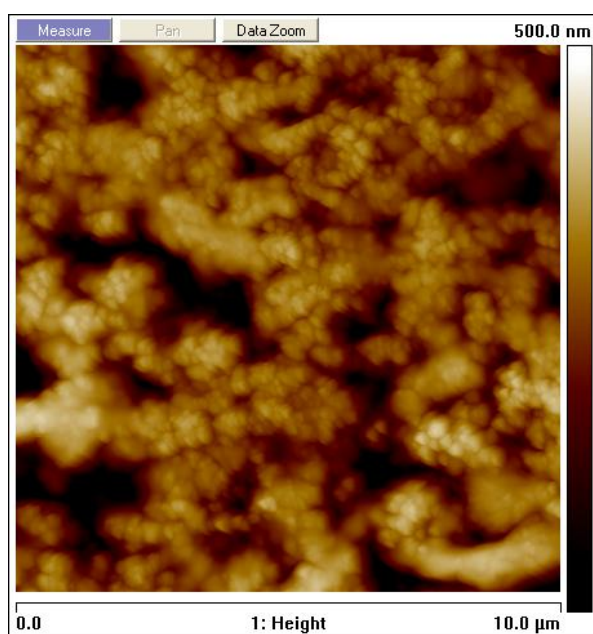

**Figure S2.** AFM image corresponding to the organogel of **1** in 1,4-dioxane (4% w/v)

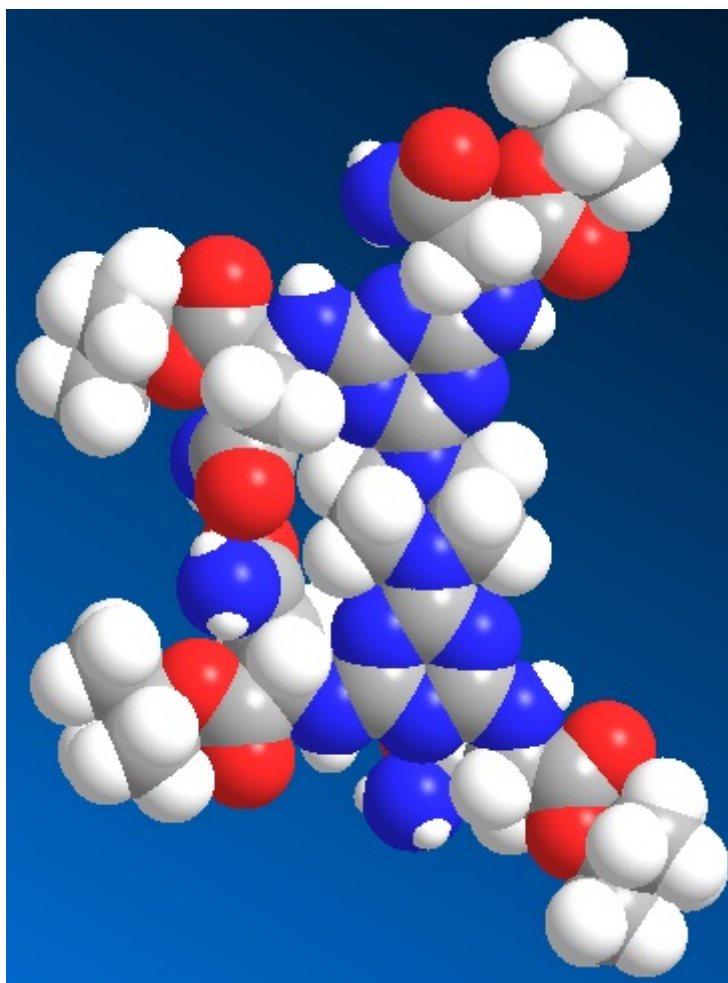

**Figure S3.** CPK model of the minimized structure of the compound **1** generated with the semiempirical PM3 implemented in Gaussian 03.<sup>1</sup>

#### References

1. Gaussian 03, Revision E.01, M. J. Frisch, G. W. Trucks, H. B. Schlegel, G. E. Scuseria, M. A. Robb, J. R. Cheeseman, J. A. Montgomery, Jr., T. Vreven, K. N. Kudin, J. C. Burant, J. M. Millam, S. S. Iyengar, J. Tomasi, V. Barone, B. Mennucci, M. Cossi, G. Scalmani, N. Rega, G. A. Petersson, H. Nakatsuji, M. Hada, M. Ehara, K. Toyota, R. Fukuda, J. Hasegawa, M. Ishida, T. Nakajima, Y. Honda, O. Kitao, H. Nakai, M. Klene, X. Li, J. E. Knox, H. P. Hratchian, J. B. Cross, V. Bakken, C. Adamo, J. Jaramillo, R. Gomperts, R. E. Stratmann, O. Yazyev, A. J. Austin, R. Cammi, C. Pomelli, J. W. Ochterski, P. Y. Ayala, K. Morokuma, G. A. Voth, P. Salvador, J. J. Dannenberg, V. G. Zakrzewski, S. Dapprich, A. D. Daniels, M. C. Strain, O. Farkas, D. K. Malick, A. D. Rabuck, K. Raghavachari, J. B. Foresman, J. V. Ortiz, Q. Cui, A. G. Baboul, S. Clifford, J. Cioslowski, B. B. Stefanov, G. Liu, A. Liashenko, P. Piskorz,

I. Komaromi, R. L. Martin, D. J. Fox, T. Keith, M. A. Al-Laham, C. Y. Peng, A. Nanayakkara, M. Challacombe, P. M. W. Gill, B. Johnson, W. Chen, M. W. Wong, C. Gonzalez, and J. A. Pople, Gaussian, Inc., Wallingford CT, 2004.

**Figure S4.**  $^1\text{H}$  NMR spectrum of compound **1** in  $\text{DMSO-d}_6$

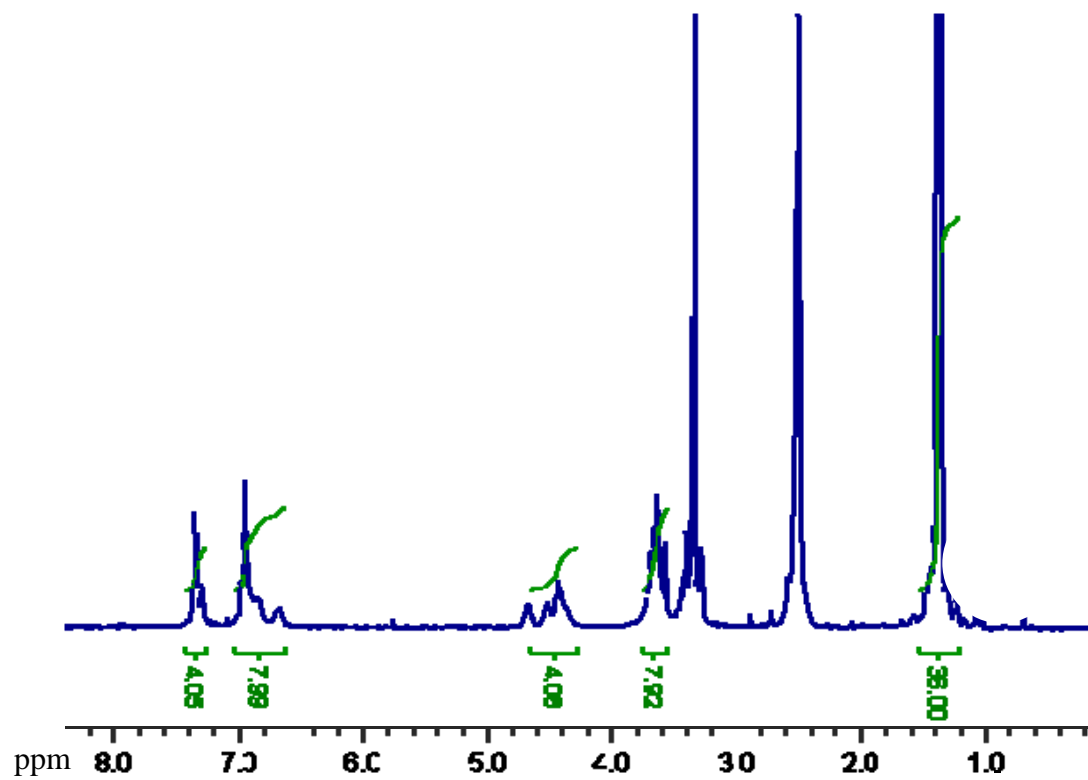

Supplement: b817565a.pdf [file b817565a.pdf]
